# Supplementary material for: A New Model Trypanosomatid, Novymonas esmeraldas: Genomic Perception of Its “Candidatus Pandoraea novymonadis” Endosymbiont
Source: PubMed Central journal article supplement (PMC8406214; doi:10.1128/mbio.01606-21), 2021-08-17

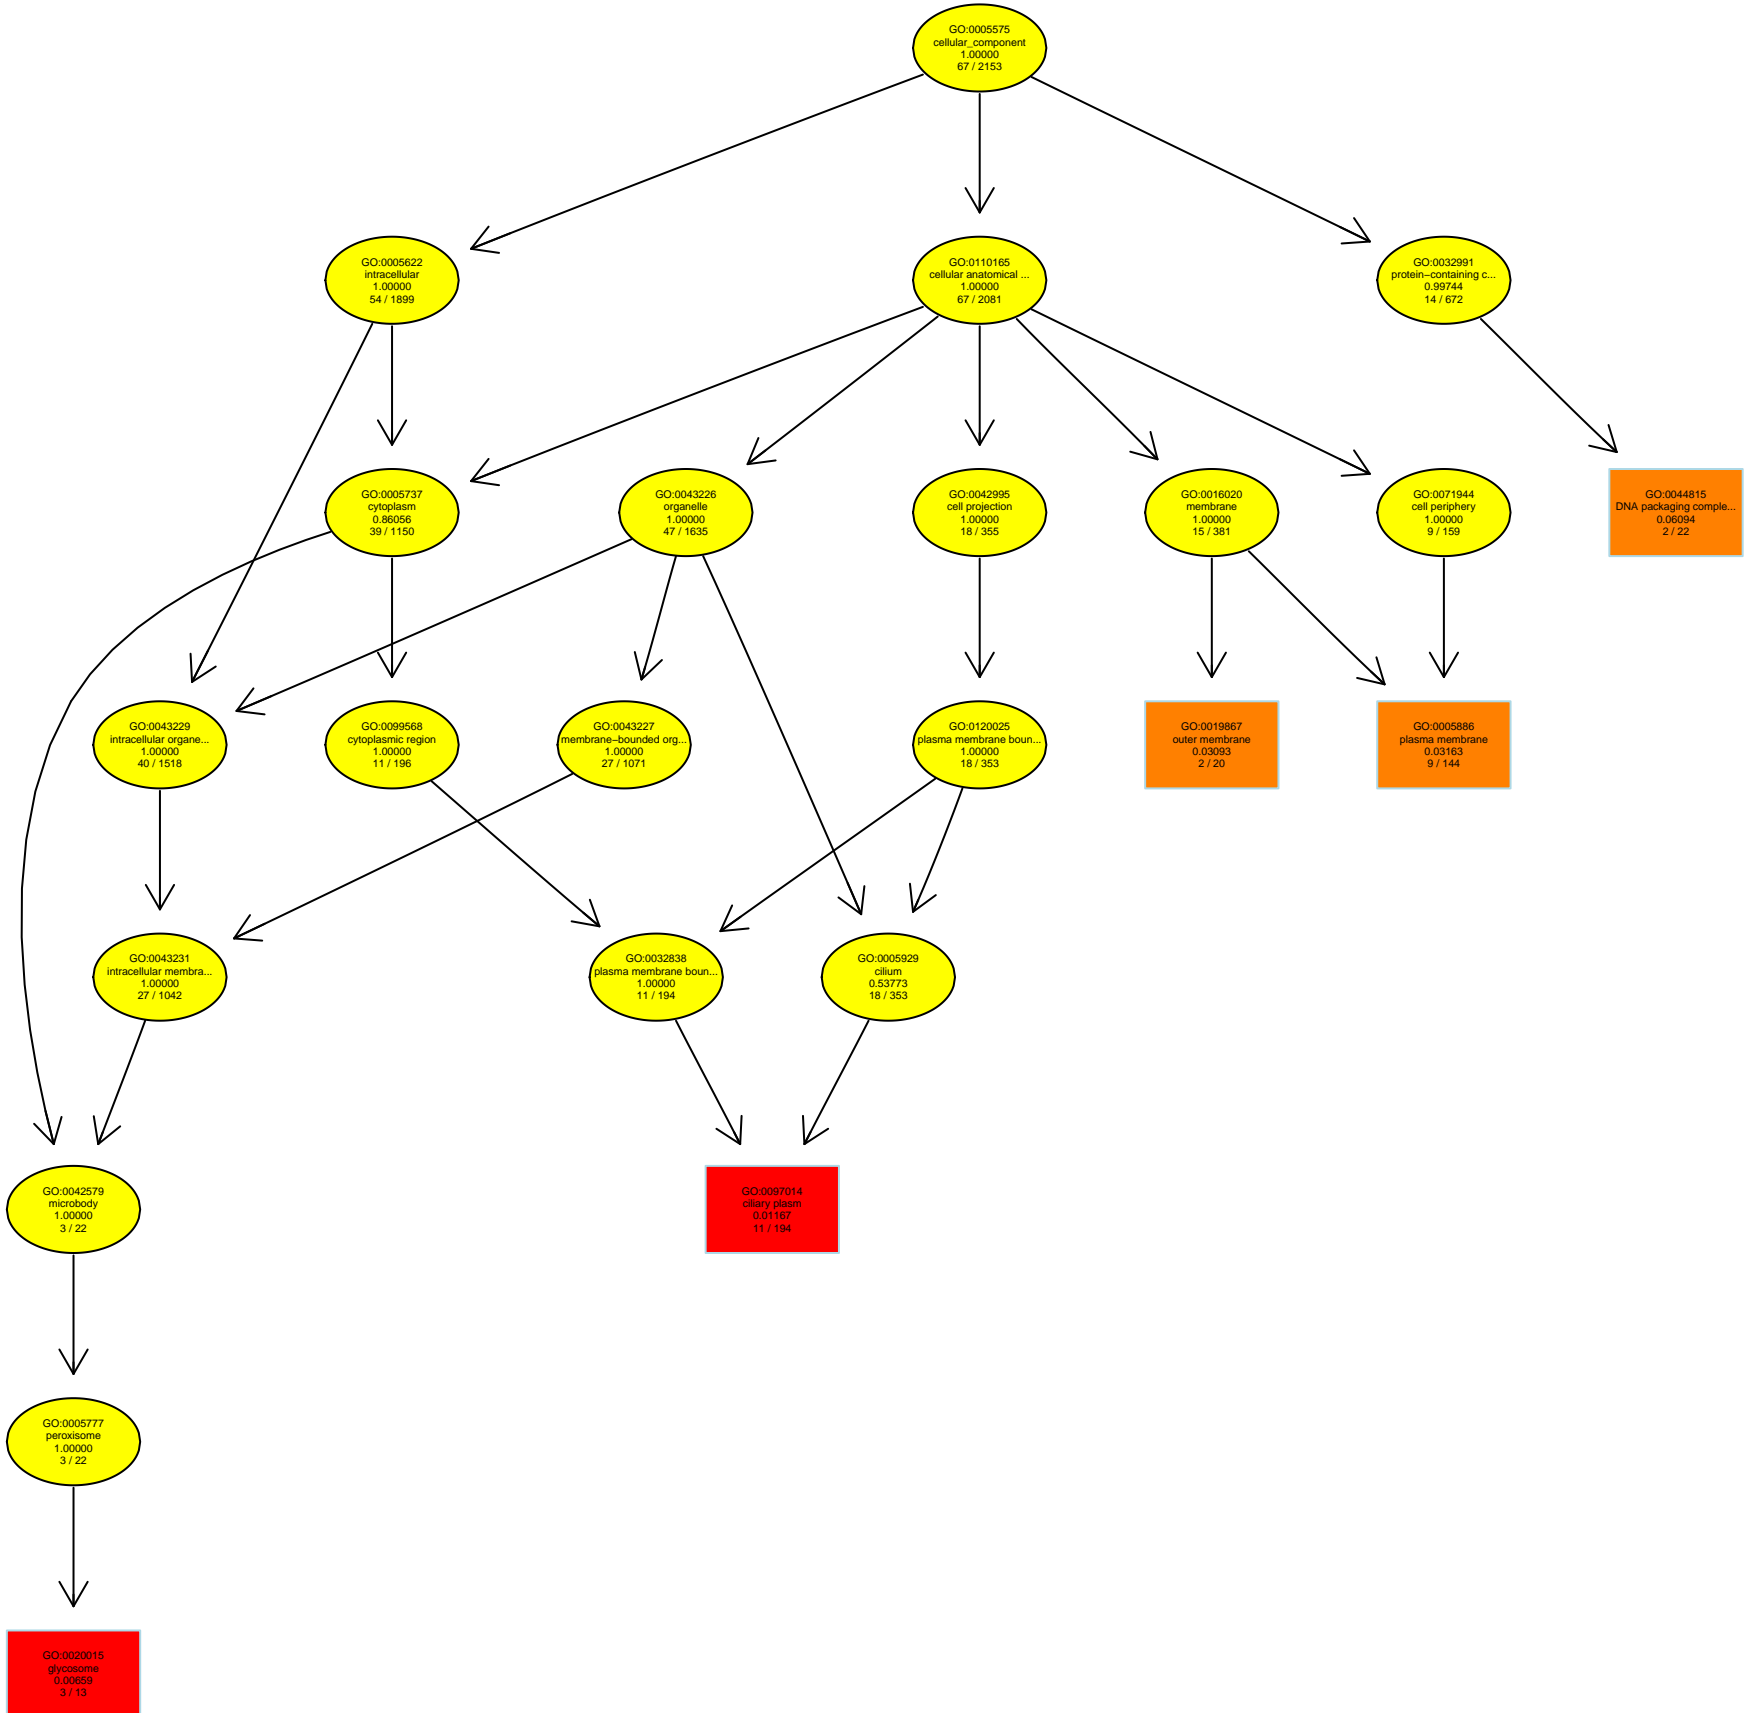

Supplement: mbio.01606-21-sf004.pdf [file mbio.01606-21-sf004.pdf]
